# Supplementary material for: Synthesis and characterization of a zinc metal–organic framework with chiral nano-pores
Source: Royal Society of Chemistry journal article supplement (doi:10.1039/c2ce25780g), 2012-01-01
Supplement: c2ce25780g.pdf [file c2ce25780g.pdf]

Supplementary Information

## Synthesis and Characterization of a Zinc Metal-Organic Framework with Chiral Nano-Pores

Lingjuan Shen, Danielle Gray, Richard I. Masel, Gregory S. Girolami\*

**Synthesis of  $Zn_3(BPDC)_2(O_2CH)_2 \cdot 2DEF$  (**1**•2DEF).** The chemicals were obtained from Aldrich and used as received. The synthesis was performed under solvothermal conditions.  $Zn(NO_3)_2 \cdot 6H_2O$  (0.0446 g, 0.15 mmol), 2,2'-bipyridine-5,5'-dicarboxylic acid (0.0244 g, 0.10 mmol) and formic acid (0.8 mL of a 75% aqueous solution) were mixed and dispersed in DEF (5 mL). The resulting white slurry was then heated in an oven at 100 °C for 3 weeks to afford octahedron-shaped crystals (Figure S1); the long duration of this step probably reflects the limited solubility of 2,2'-bipyridine-5,5'-dicarboxylic acid in DEF. Yield: 70%. Anal. for the as-prepared material (University of Illinois Microanalytical Laboratory): Calc. for  $Zn_3(BPDC)_2(O_2CH)_2 \cdot 2DEF$ : C, 43.1; H, 3.42; N, 8.38. Found: C, 42.8; H, 3.13; N, 8.35. Desolvation to **1** was achieved by immersing the as-prepared crystals in chloroform (5 mL) for three days, with the solvent being changed once daily. The solid was then collected by filtration and dried in a vacuum oven at 120 °C for 3 h.

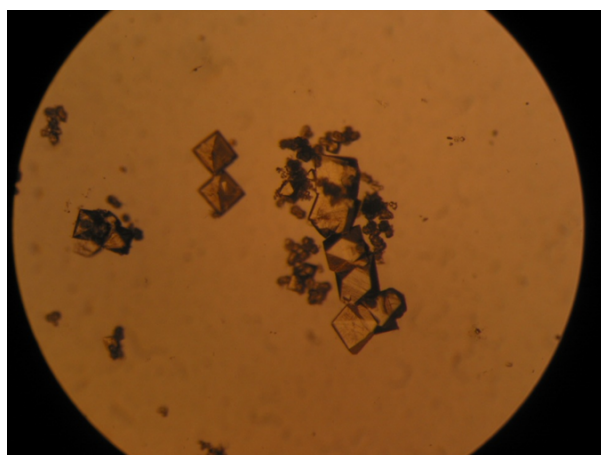

200 μm

**Fig S1.** Crystals of **1**•2DEF.

**Brunauer - Emmett - Teller (BET) measurements.** Three-point BET ( $P/P_0 = 0.1-0.3$ ) surface area measurements were performed on a QuantachromeNova 2200e apparatus at liquid nitrogen temperature using nitrogen as the working gas.

**Powder X-ray diffraction.** Powder XRD data were collected on a Bruker General Area Detector Diffraction System (GADDS) equipped with a P4 four-circle diffractometer and HiStar multiwire area detector. A Bruker M18XHF22 rotating anode generator operating at 50kV and 40mA supplied the  $Cu\ K\alpha$  graphite monochromatized incident beam. The simulated powder diffraction pattern calculated from the single crystal X-ray data of as-synthesized **1**•2DEF matches well with the observed pattern for desolvated **1** (Figure S2).

## Supplementary Information

**Thermogravimetric Analysis (TGA).** TGA experiments were performed on Cahn Thermax 500 Thermogravimetric Analyzer (Figure S3).

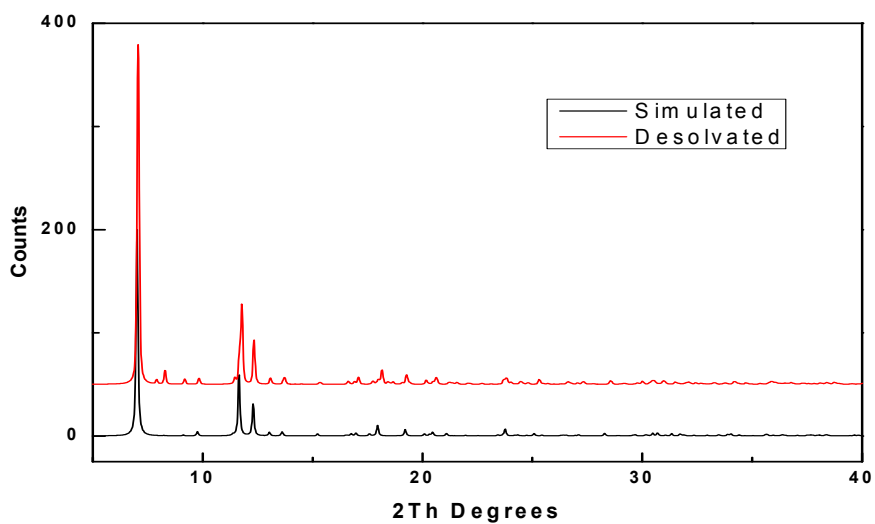

**Fig S2.** Powder X-ray diffraction pattern of desolvated **1** (red), and pattern calculated from the single crystal structure of as-synthesized **1•2DEF** (black).

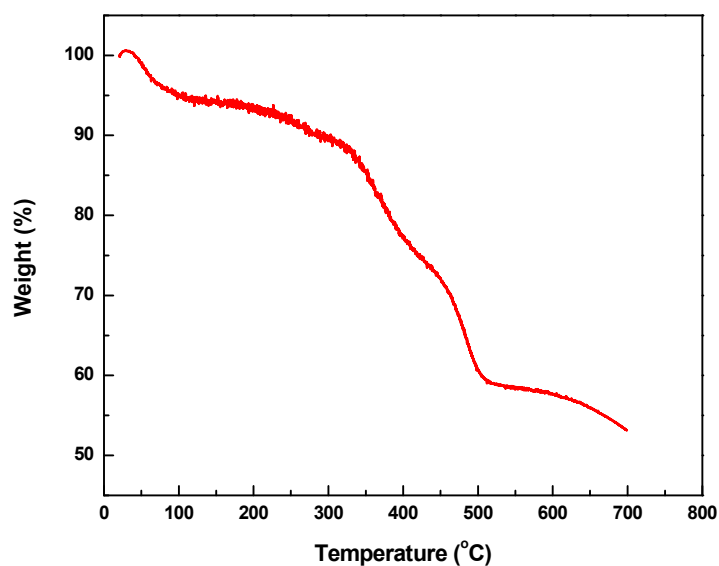

**Fig S3.** Thermogravimetric analysis of a freshly prepared sample of **1•2DEF**.

## Supplementary Information

**X-ray single crystal diffraction.** The data crystal was mounted using oil (Paratone-N, Exxon) to a glass fiber. One distinct cell was identified using APEX2 (Bruker, 2010). Twenty frame series were integrated and filtered for statistical outliers using SAINT (Bruker, 2005) then corrected for absorption by integration using SHELXTL/XPREF V2005/2 (Bruker, 2005) before using SADABS (Bruker, 2005) to sort, merge, and scale the combined data. The absorption correction was done prior to the squeeze process using an absorption coefficient that included the contribution from the two diethylformamide molecules per formula unit. No decay correction was applied. The final refinements excluded the 0 2 3 and 0 1 3 reflections. The structure was phased by direct methods (Sheldrick, 2008). Systematic conditions were consistent with both of the enantiomorphic space groups  $P4_12_12$  or  $P4_32_12$ . On the basis of 1955 unmerged Friedel opposites, the fractional contribution of the racemic twin was close to 50% (Flack, 1983 & 2000). The fractional contribution was checked before the "squeeze" process and the  $P4_12_12$  component was slightly larger than the  $P4_32_12$  component by ~1%. After the "squeeze" process the ratio was 0.50(4). The central portion of the  $-\text{OOC}(\text{C}_{10}\text{H}_6\text{N}_2)\text{COO}-$  unit was disordered over two sites. The Zn-N distances in the disordered ligand were restrained to be similar. The bond distances and angles within the disordered molecules were restrained to be similar and the central portion of the molecule was also restrained to be approximately flat. The O3 atom was also split over two sites. The like C-O distances for this atom were restrained to be similar. Rigid-bond restraints were imposed on displacement parameters for all disordered sites, and similar displacement amplitudes were imposed on disordered sites overlapping by less than the sum of the van der Waals radii. C13 and O6 of the bound formate ligand have large displacement parameters. This is because O6 is not bound to the framework and the molecule can freely pivot about the O5-C13 axis in the solvent cavity. The highest peaks in the final difference Fourier map were in the vicinity of atom Zn2; the final map had no other significant features. A final analysis of variance between observed and calculated structure factors showed little dependence on amplitude and some dependence on resolution.

Supplementary Information

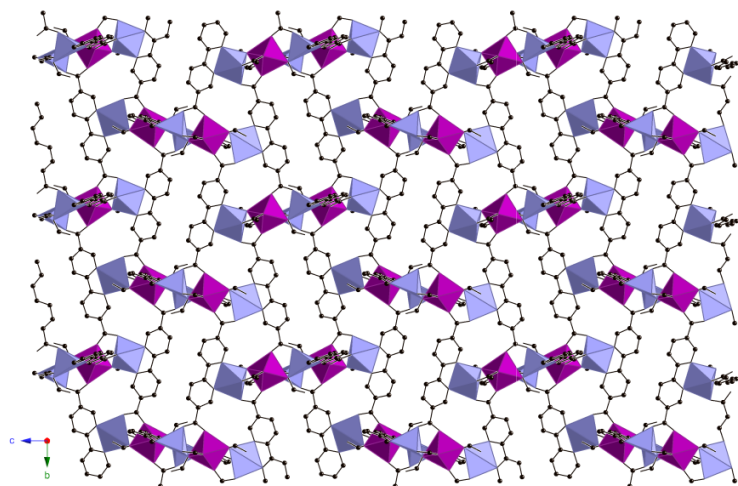

**Fig S4.** Representation of the structure of **1** along the *a* axis (C, black; Zn1, light purple polyhedron; Zn2, purple polyhedron; H, omitted).

Supplementary Information

Table S1. Crystal data and structure refinement for  $Zn_3(BPDC)_2(O_2CH)_2 \cdot 2DEF$ .

|                                        |                                                                                |                       |
|----------------------------------------|--------------------------------------------------------------------------------|-----------------------|
| Empirical formula                      | C <sub>36</sub> H <sub>36</sub> N <sub>6</sub> O <sub>14</sub> Zn <sub>3</sub> |                       |
| Formula weight                         | 972.82                                                                         |                       |
| Temperature                            | 100(2) K                                                                       |                       |
| Wavelength                             | 1.54178 Å                                                                      |                       |
| Crystal system                         | Tetragonal                                                                     |                       |
| Space group                            | P4(1)2(1)2                                                                     |                       |
| Unit cell dimensions                   | $a = 15.1751(3)$ Å                                                             | $\alpha = 90^\circ$ . |
|                                        | $b = 15.1751(3)$ Å                                                             | $\beta = 90^\circ$ .  |
|                                        | $c = 22.5604(8)$ Å                                                             | $\gamma = 90^\circ$ . |
| Volume                                 | 5195.3(2) Å <sup>3</sup>                                                       |                       |
| Z                                      | 4                                                                              |                       |
| Density (calculated)                   | 1.244 Mg/m <sup>3</sup>                                                        |                       |
| Absorption coefficient                 | 2.111 mm <sup>-1</sup>                                                         |                       |
| F(000)                                 | 1984                                                                           |                       |
| Crystal size                           | 0.164 x 0.072 x 0.07 mm <sup>3</sup>                                           |                       |
| Theta range for data collection        | 4.12 to 67.73°.                                                                |                       |
| Index ranges                           | -18 ≤ h ≤ 14, -17 ≤ k ≤ 18, -26 ≤ l ≤ 27                                       |                       |
| Reflections collected                  | 57131                                                                          |                       |
| Independent reflections                | 4672 [R(int) = 0.0466]                                                         |                       |
| Completeness to $\theta = 67.73^\circ$ | 99.4 %                                                                         |                       |
| Absorption correction                  | Integration                                                                    |                       |
| Max. and min. transmission             | 0.9322 and 0.8488                                                              |                       |
| Refinement method                      | Full-matrix least-squares on F <sup>2</sup>                                    |                       |
| Data / restraints / parameters         | 4672 / 503 / 324                                                               |                       |
| Goodness-of-fit on $F^2$               | 1.099                                                                          |                       |
| Final R indices [ $I > 2\sigma(I)$ ]   | R1 = 0.0422, wR2 = 0.1174                                                      |                       |
| R indices (all data)                   | R1 = 0.0427, wR2 = 0.1178                                                      |                       |
| Absolute structure parameter           | 0.50(4)                                                                        |                       |
| Largest diff. peak and hole            | 1.109 and -0.400 e.Å <sup>-3</sup>                                             |                       |

Supplementary Information

Table S2. Selected bond distances and angles for  $Zn_3(BPDC)_2(O_2CH)_2 \cdot 2DEF$ .

| Bond lengths [Å] |           | Angles [°]          |            | Angles [°]            |            |
|------------------|-----------|---------------------|------------|-----------------------|------------|
| Zn(1)-O(2)#1     | 2.006(2)  | O(2)#1-Zn(1)-O(5)   | 103.45(10) | O(3)#3-Zn(2)-O(5)     | 93.4(13)   |
| Zn(1)-O(5)       | 2.037(2)  | O(2)#1-Zn(1)-O(4)#2 | 96.27(12)  | O(1)#4-Zn(2)-O(5)     | 91.42(10)  |
| Zn(1)-O(4)#2     | 2.051(2)  | O(5)-Zn(1)-O(4)#2   | 99.14(11)  | O(1)#1-Zn(2)-O(5)     | 93.21(10)  |
| Zn(1)-N(1)       | 2.101(5)  | O(2)#1-Zn(1)-N(1)   | 100.7(5)   | O(5)#5-Zn(2)-O(5)     | 173.54(15) |
| Zn(1)-N(1B)      | 2.111(6)  | O(5)-Zn(1)-N(1)     | 151.4(4)   | O(3)#2-Zn(2)-O(3B)#2  | 12.0(10)   |
| Zn(1)-N(2B)      | 2.158(6)  | O(4)#2-Zn(1)-N(1)   | 93.1(2)    | O(3)#3-Zn(2)-O(3B)#2  | 84.0(13)   |
| Zn(1)-N(2)       | 2.176(5)  | O(2)#1-Zn(1)-N(1B)  | 99.7(7)    | O(1)#4-Zn(2)-O(3B)#2  | 176.8(7)   |
| Zn(2)-O(3)#2     | 1.951(16) | O(5)-Zn(1)-N(1B)    | 153.0(6)   | O(1)#1-Zn(2)-O(3B)#2  | 90.0(7)    |
| Zn(2)-O(3)#3     | 1.951(16) | O(4)#2-Zn(1)-N(1B)  | 91.8(3)    | O(5)#5-Zn(2)-O(3B)#2  | 84.2(5)    |
| Zn(2)-O(1)#4     | 2.055(3)  | N(1)-Zn(1)-N(1B)    | 1.8(8)     | O(5)-Zn(2)-O(3B)#2    | 91.3(5)    |
| Zn(2)-O(1)#1     | 2.055(3)  | O(2)#1-Zn(1)-N(2B)  | 91.6(9)    | O(3)#2-Zn(2)-O(3B)#3  | 84.0(13)   |
| Zn(2)-O(5)#5     | 2.091(2)  | O(5)-Zn(1)-N(2B)    | 88.3(5)    | O(3)#3-Zn(2)-O(3B)#3  | 12.0(10)   |
| Zn(2)-O(5)       | 2.091(2)  | O(4)#2-Zn(1)-N(2B)  | 167.6(5)   | O(1)#4-Zn(2)-O(3B)#3  | 90.0(7)    |
| Zn(2)-O(3B)#2    | 2.093(15) | N(1)-Zn(1)-N(2B)    | 75.9(4)    | O(1)#1-Zn(2)-O(3B)#3  | 176.8(7)   |
| Zn(2)-O(3B)#3    | 2.093(15) | N(1B)-Zn(1)-N(2B)   | 77.4(4)    | O(5)#5-Zn(2)-O(3B)#3  | 91.3(5)    |
| O(1)-C(11)       | 1.236(5)  | O(2)#1-Zn(1)-N(2)   | 91.9(6)    | O(5)-Zn(2)-O(3B)#3    | 84.2(5)    |
| O(1)-Zn(2)#6     | 2.055(3)  | O(5)-Zn(1)-N(2)     | 87.4(3)    | O(3B)#2-Zn(2)-O(3B)#3 | 91.8(14)   |
| O(2)-C(11)       | 1.266(4)  | O(4)#2-Zn(1)-N(2)   | 168.0(4)   | C(11)-O(1)-Zn(2)#6    | 134.2(2)   |
| O(2)-Zn(1)#6     | 2.006(2)  | N(1)-Zn(1)-N(2)     | 76.7(2)    | C(11)-O(2)-Zn(1)#6    | 128.2(2)   |
| O(3)-C(12)       | 1.271(8)  | N(1B)-Zn(1)-N(2)    | 78.2(4)    | C(12)-O(3)-Zn(2)#7    | 155(3)     |
| O(3)-Zn(2)#7     | 1.951(16) | N(2B)-Zn(1)-N(2)    | 0.9(9)     | C(12)-O(3B)-Zn(2)#7   | 137.6(15)  |
| O(3B)-C(12)      | 1.268(6)  | O(3)#2-Zn(2)-O(3)#3 | 78(2)      | C(12)-O(4)-Zn(1)#4    | 120.7(2)   |
| O(3B)-Zn(2)#7    | 2.093(15) | O(3)#2-Zn(2)-O(1)#4 | 171.2(14)  | C(13)-O(5)-Zn(1)      | 106.1(3)   |
| O(4)-C(12)       | 1.251(4)  | O(3)#3-Zn(2)-O(1)#4 | 97.4(12)   | C(13)-O(5)-Zn(2)      | 131.4(3)   |
| O(4)-Zn(1)#4     | 2.051(2)  | O(3)#2-Zn(2)-O(1)#1 | 97.4(12)   | Zn(1)-O(5)-Zn(2)      | 110.67(11) |
|                  |           | O(3)#3-Zn(2)-O(1)#1 | 171.2(14)  | C(1)-N(1)-C(5)        | 120.1(5)   |
|                  |           | O(1)#4-Zn(2)-O(1)#1 | 88.25(18)  | C(1)-N(1)-Zn(1)       | 122.9(5)   |
|                  |           | O(3)#2-Zn(2)-O(5)#5 | 93.4(13)   | C(5)-N(1)-Zn(1)       | 116.4(4)   |
|                  |           | O(3)#3-Zn(2)-O(5)#5 | 81.5(13)   | C(10)-N(2)-C(6)       | 118.0(6)   |
|                  |           | O(1)#4-Zn(2)-O(5)#5 | 93.21(10)  | C(10)-N(2)-Zn(1)      | 127.4(5)   |
|                  |           | O(1)#1-Zn(2)-O(5)#5 | 91.42(10)  | C(6)-N(2)-Zn(1)       | 114.3(4)   |
|                  |           | O(3)#2-Zn(2)-O(5)   | 81.5(13)   |                       |            |

Symmetry transformations used to generate equivalent atoms: #1  $y-1/2, -x+1/2, z-1/4$  #2  $-x+1/2, y+1/2, -z+1/4$   
 #3  $y+1/2, -x+1/2, z-1/4$  #4  $-x+1/2, y-1/2, -z+1/4$  #5  $y, x, -z$  #6  $-y+1/2, x+1/2, z+1/4$  #7  $-y+1/2, x-1/2, z+1/4$
